# Supplementary figures and images for: Conservation and Divergence of the Trihelix Genes in Brassica and Expression Profiles of BnaTH Genes in Brassica napus under Abiotic Stresses
Source: MDPI journal article supplement (doi:10.3390/ijms232415766), 2022-12-12

## A 16 Bra SIP1 TH

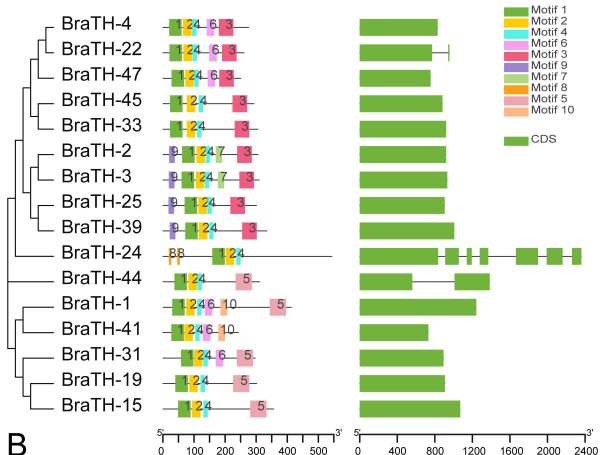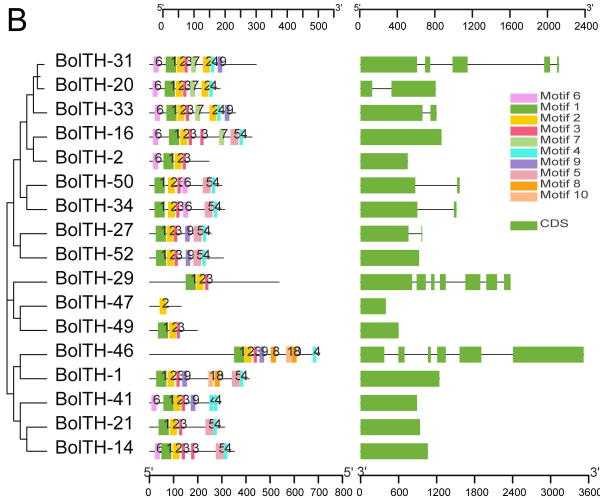

## C 30 Bna SIP1 TH

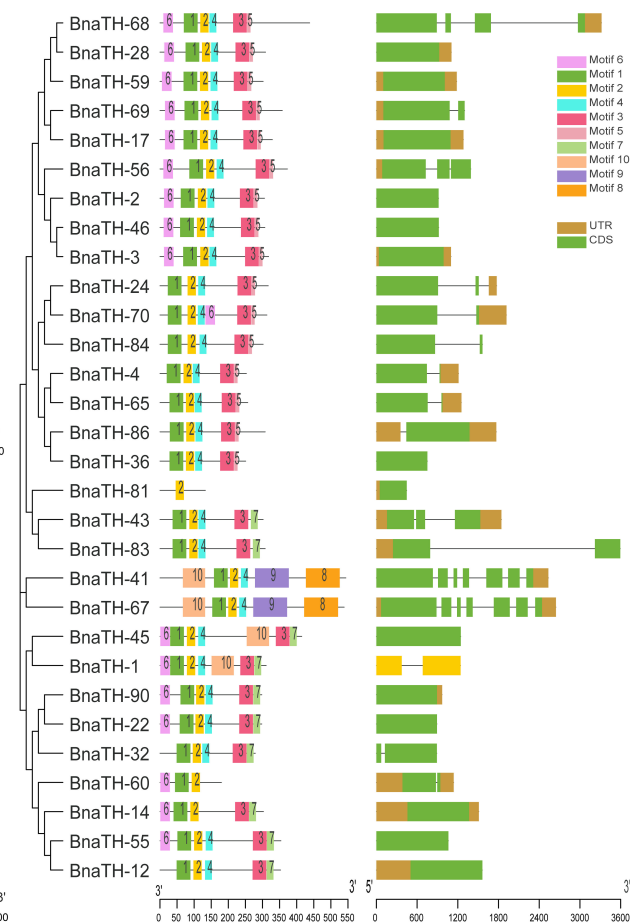

## 17 BoI SIP1 TH

Supplement: s1 [file s1]

SH4  
GTy  
GT-1  
GT-2  
SIP1

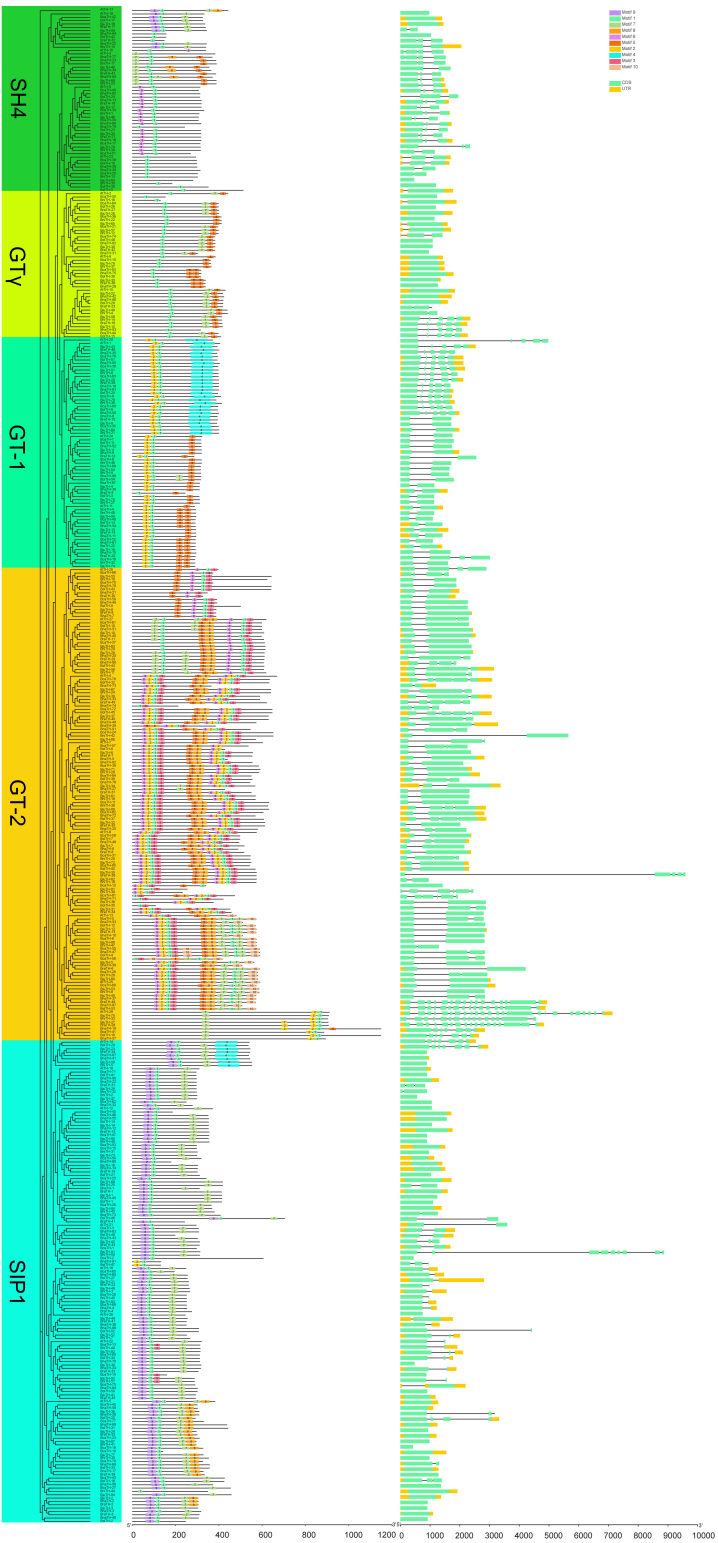

Supplement: s1 [file s1]
